# Supplementary material
Source: PubMed Central journal article supplement (PMC6463692)
Supplement: supp_RA118.006915_Supplemental_Figures.pdf [file supp_RA118.006915_Supplemental_Figures.pdf]

Structural basis of target-binding mode of GIT1 in regulating focal adhesion dynamics

**Mingfu Liang<sup>1,5</sup>, Xingqiao Xie<sup>1,2,5</sup>, Jian Pan<sup>1</sup>, Gaowei Jin<sup>1</sup>, Cong Yu<sup>1,3,4\*</sup>, Zhiyi Wei<sup>1\*</sup>**

<sup>1</sup>Department of Biology, Southern University of Science and Technology, Shenzhen, China 518055

<sup>2</sup>SUSTech Academy for Advanced Interdisciplinary Studies, Southern University of Science and Technology, Shenzhen, China 518055

<sup>3</sup>Guangdong Provincial Key Laboratory of Cell Microenvironment and Disease Research, Shenzhen, China 518055

<sup>4</sup>Shenzhen Key Laboratory of Cell Microenvironment, Shenzhen, China 518055

<sup>5</sup>These authors contributed equally to this work.

\*Corresponding author: [weizy@sustc.edu.cn](mailto:weizy@sustc.edu.cn); [yuc@sustc.edu.cn](mailto:yuc@sustc.edu.cn)

**SUPPLEMENTAL Figures**

**Figure S1**

**Figure S2**

**Figure S3**

**Figure S4**

**Figure S5**

**Table S1**

**Figure S1.**

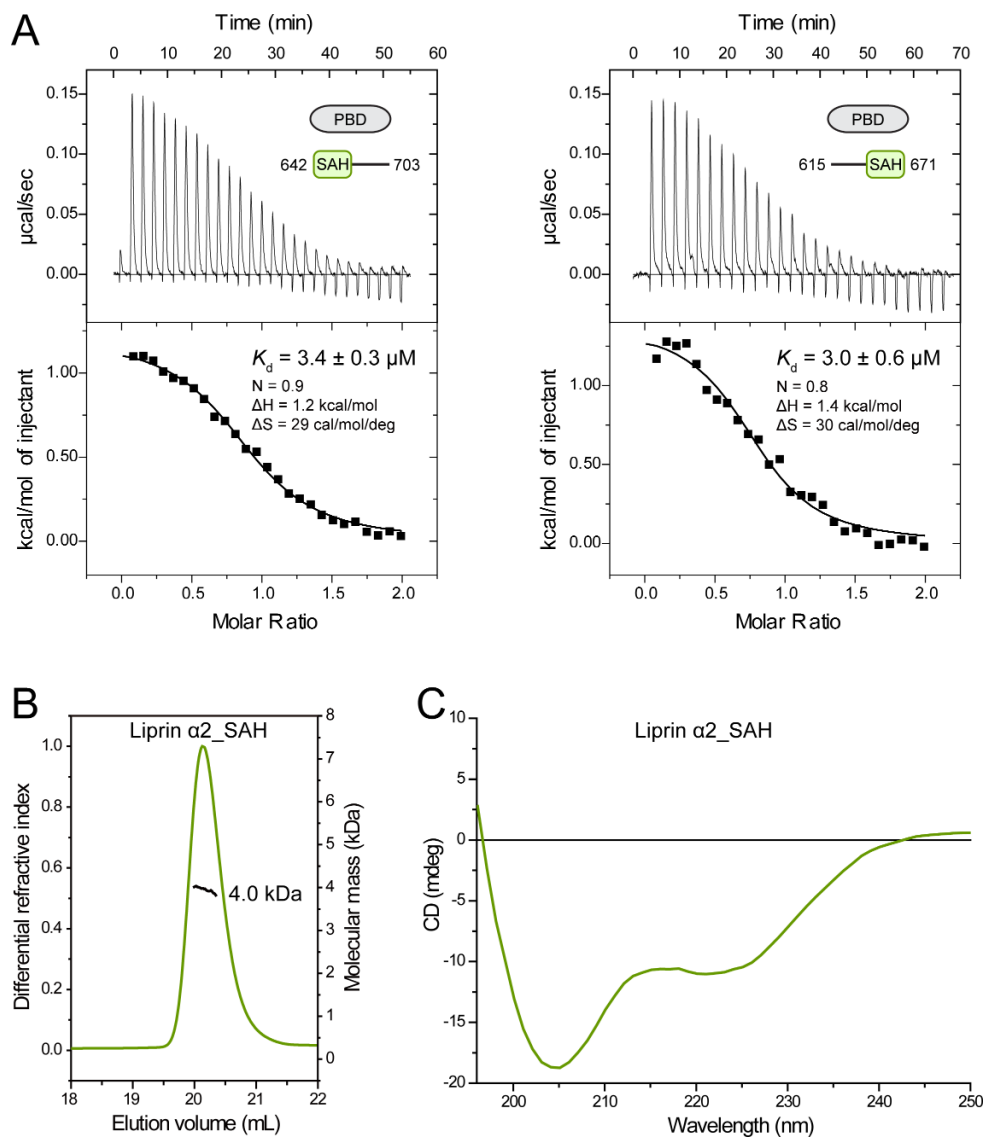

**Figure S1. Biochemical characterization of Liprin  $\alpha 2$ \_SAH.** (A) ITC-based measurement of the binding affinities between GIT1\_PBD and two Liprin  $\alpha 2$  fragments. (B) Gel filtration and molecular mass analysis of Liprin- $\alpha 2$ \_SAH with Trx-tag removed. The theoretical molecular weight of monomeric Liprin- $\alpha 2$ \_SAH is 4.0 kDa. (C). Circular dichroism (CD) spectroscopy measurement of SAH.

**Figure S2.**

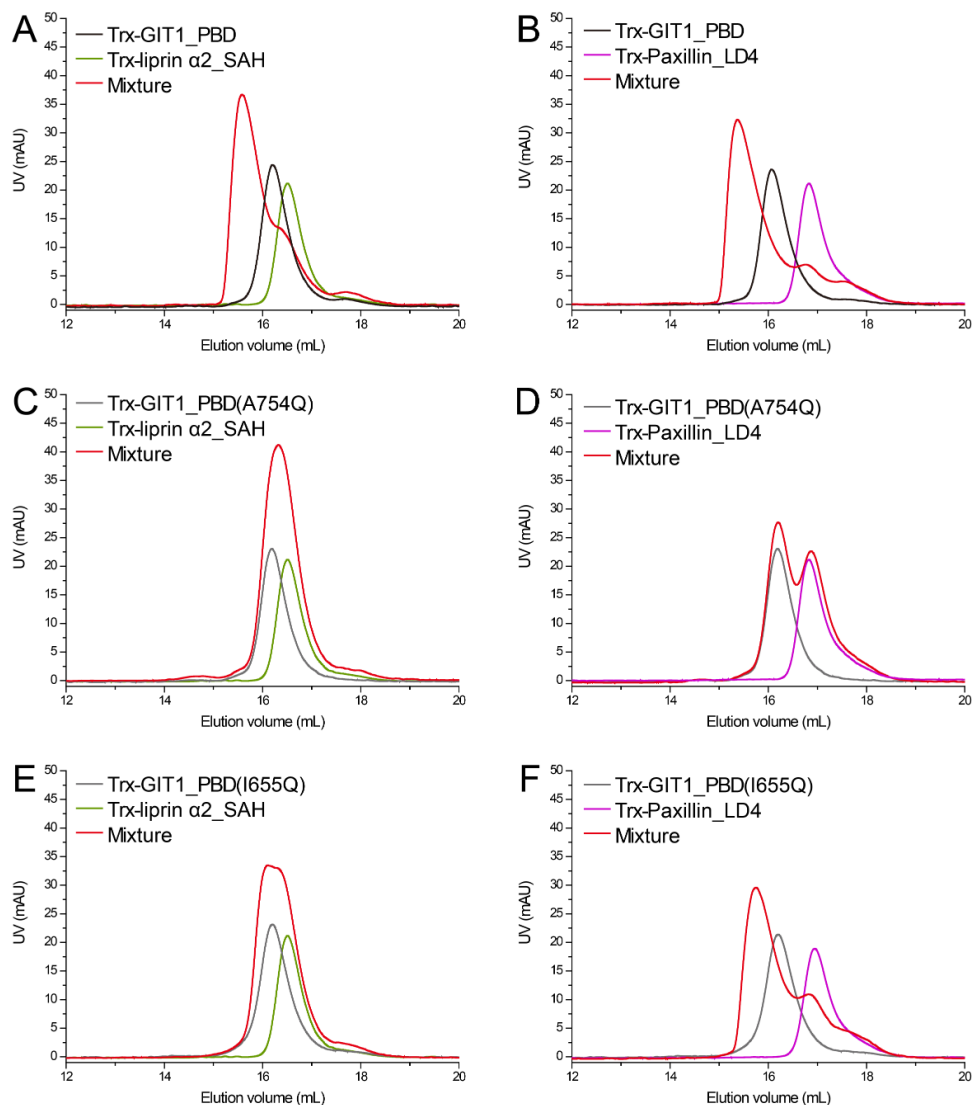

**Figure S2. Analytical gel filtration analysis of the bindings of GIT1\_PBD and its mutants to either Liprin- $\alpha$ 2\_SAH or Paxillin\_LD4. (A&B) GIT1\_PBD forms a stable complex with either Liprin- $\alpha$ 2\_SAH (A) or Paxillin\_LD4 (B). (C&D) The A754Q mutation disrupts the binding of GIT1\_PBD to both SAH (C) and LD4 (D). (E&F) The I655Q mutation disrupts the binding of GIT1\_PBD to SAH (E), but not to LD4 (F).**

Figure S3

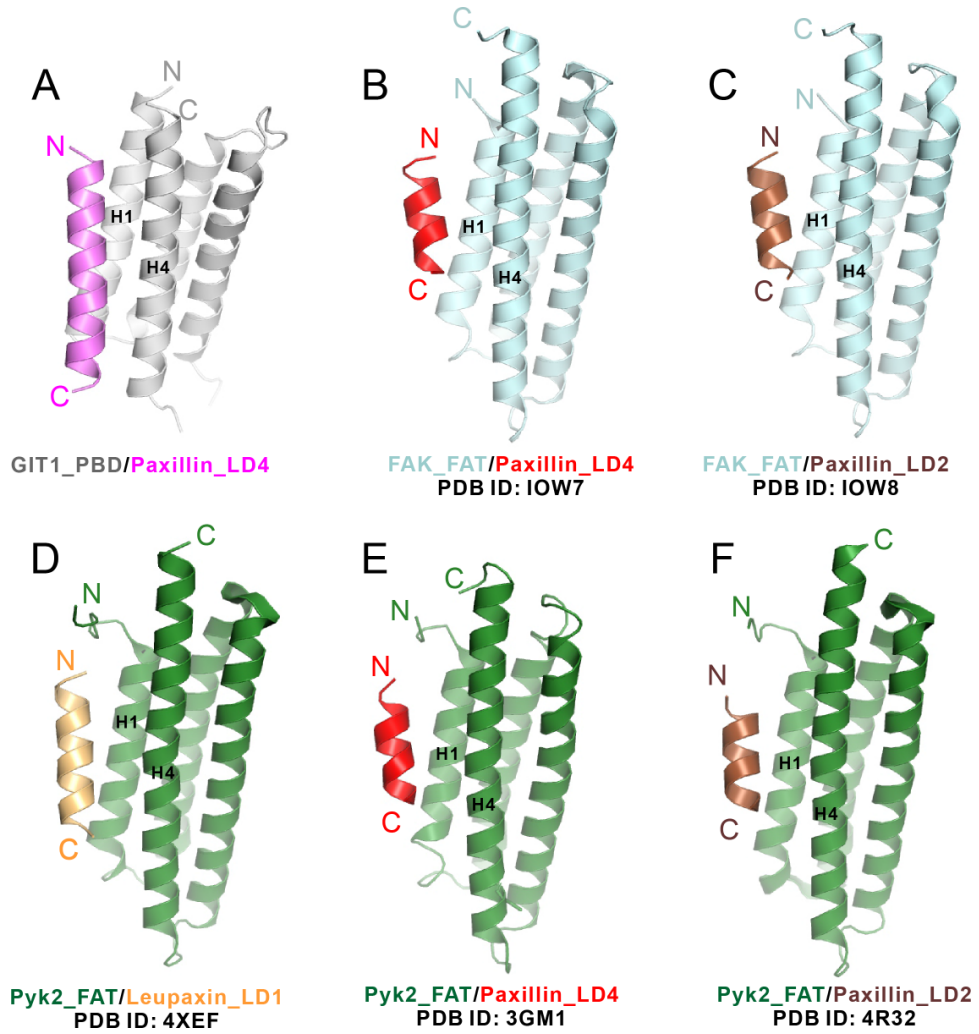

Figure S3. Structural comparison of the LD-binding modes between GIT1\_PBD (A) and other FAT-like domains (B-F).

Figure S4

GIT1\_PBD to liprin  $\alpha$ 2\_SAH(A650F)

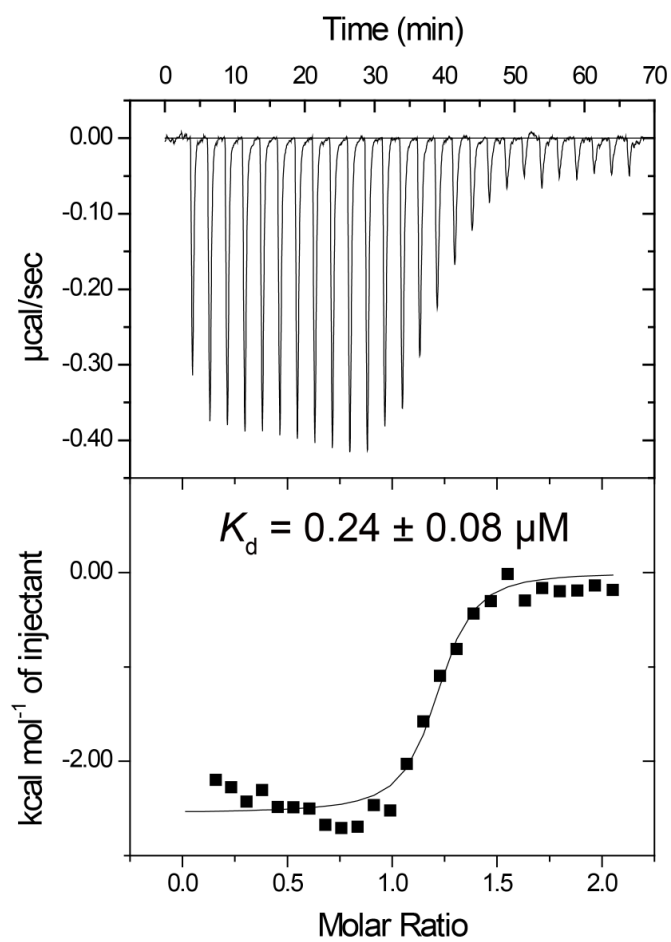

Figure S4. ITC-based analysis of the interaction between the GIT1\_PBD A650F mutant and Liprin- $\alpha$ 2\_SAH.

Figure S5  
GIT1\_PBD to Paxillin\_LD2

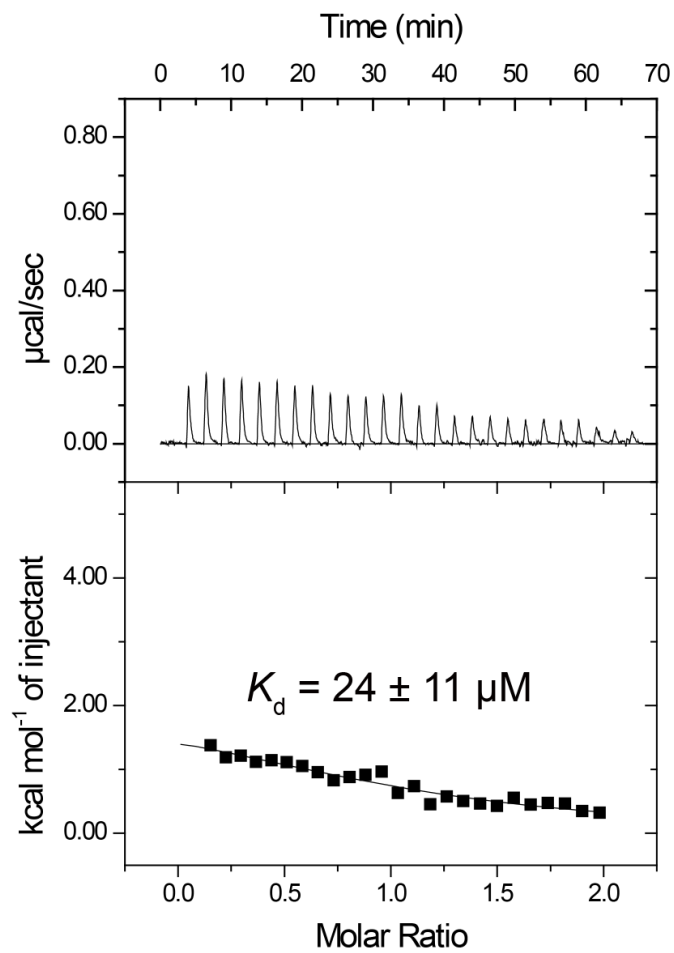

Figure S5. ITC-based analysis of the GIT1\_PBD/Paxillin\_LD2 interaction.

**Table S1. Summary of thermodynamic parameters from ITC experiments**

| <b>Interaction</b>                              | <b><math>K_d</math> (<math>\mu</math>M)</b> | <b>N</b>        | <b><math>\Delta H</math> (kcal/mol)</b> | <b><math>T\Delta S</math> (kcal/mol)</b> |
|-------------------------------------------------|---------------------------------------------|-----------------|-----------------------------------------|------------------------------------------|
| <b>GIT1_PBD/SAH</b>                             | $2.8 \pm 0.3$                               | $0.81 \pm 0.01$ | $1.04 \pm 0.02$                         | 8.61                                     |
| <b>GIT1_PBD(I665Q)/SAH</b>                      | Not detectable                              | -               | -                                       | -                                        |
| <b>GIT1_PBD(A754Q)/SAH</b>                      | Not detectable                              | -               | -                                       | -                                        |
| <b>GIT1_PBD(T665E)/SAH</b>                      | > 200                                       | -               | -                                       | -                                        |
| <b>GIT1_PBD/SAH(A650F)</b>                      | $0.24 \pm 0.08$                             | $1.19 \pm 0.02$ | $-2.55 \pm 0.06$                        | 6.47                                     |
| <b>GIT1_PBD/LD4</b>                             | $3.9 \pm 0.4$                               | $1.14 \pm 0.01$ | $-6.1 \pm 0.1$                          | 1.3                                      |
| <b>GIT1_PBD(I665Q)/LD4</b>                      | $2.4 \pm 0.4$                               | $0.90 \pm 0.02$ | $-5.2 \pm 0.2$                          | 2.4                                      |
| <b>GIT1_PBD(A754Q)/LD4</b>                      | Not detectable                              | -               | -                                       | -                                        |
| <b>GIT1_PBD(T665E)/LD4</b>                      | $1.5 \pm 0.1$                               | $0.96 \pm 0.03$ | $-6.44 \pm 0.03$                        | 1.48                                     |
| <b>GIT1_PBD/LD4(<math>\Delta</math>276-283)</b> | Not detectable                              | -               | -                                       | -                                        |
| <b>GIT1_PBD/LD4(FK/VQ)</b>                      | > 30                                        | -               | -                                       | -                                        |
| <b>GIT1_PBD/LD2</b>                             | $24 \pm 11$                                 | $1.5 \pm 0.1$   | $2.4 \pm 0.4$                           | 8.7                                      |
| <b>FAK_FAT/LD4</b>                              | $3.6 \pm 0.3$                               | $0.55 \pm 0.01$ | $-8.9 \pm 0.2$                          | -1.4                                     |
| <b>FAK_FAT/LD4(<math>\Delta</math>276-283)</b>  | $8.2 \pm 0.6$                               | $0.85 \pm 0.02$ | $-7.4 \pm 0.2$                          | -0.5                                     |

“-“ stands for not determined.
